# Supplementary material for: Effects of mouth breathing on facial skeletal development in children: a systematic review and meta-analysis
Source: PubMed Central journal article supplement (PMC7944632; doi:10.1186/s12903-021-01458-7), 2021-03-10

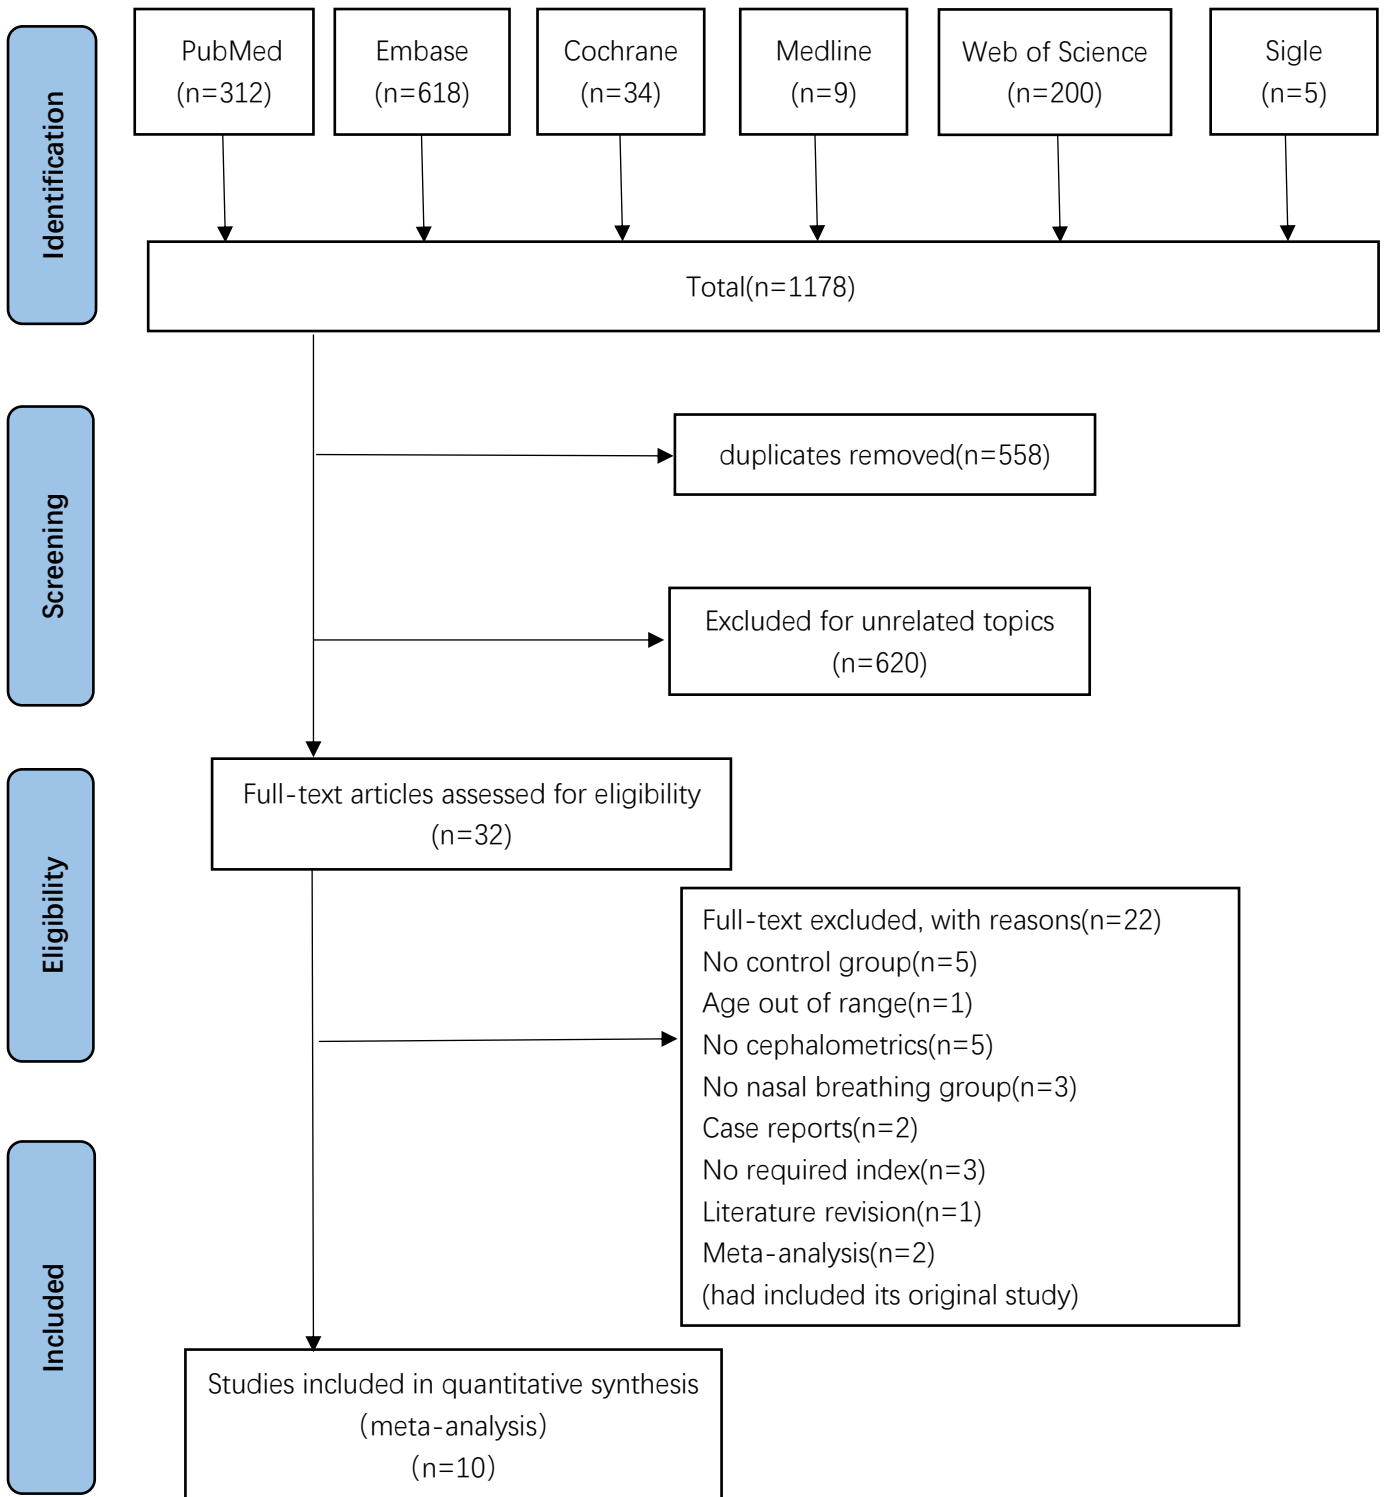

Supplement: 12903_2021_1458_MOESM3_ESM.pdf [file 12903_2021_1458_MOESM3_ESM.pdf]
