# Supplementary material for: Effects of mouth breathing on facial skeletal development in children: a systematic review and meta-analysis
Source: PubMed Central journal article supplement (PMC7944632; doi:10.1186/s12903-021-01458-7), 2021-03-10
Supplement: 12903_2021_1458_MOESM4_ESM.pdf [file 12903_2021_1458_MOESM4_ESM.pdf]

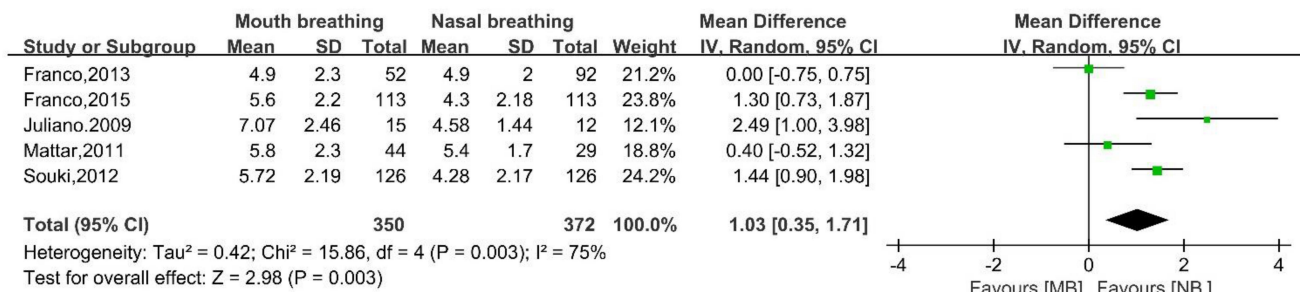

### C.1 Forest plot of ANB

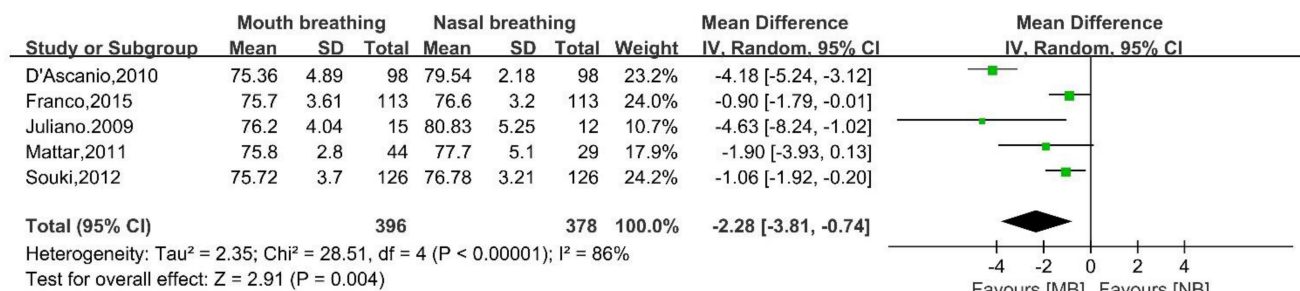

### C.2 Forest plot of SNB

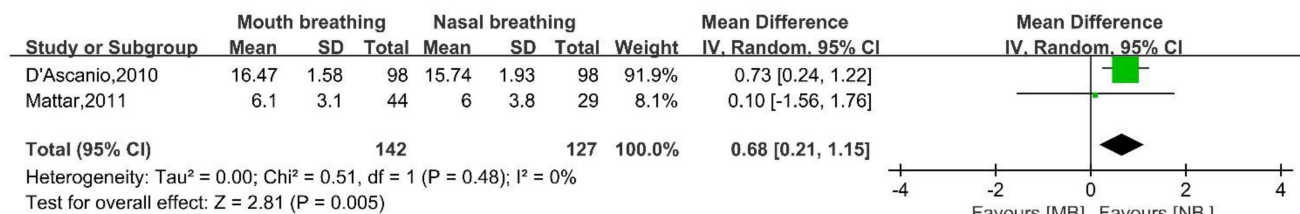

### C.3 Forest plot of SN-PP

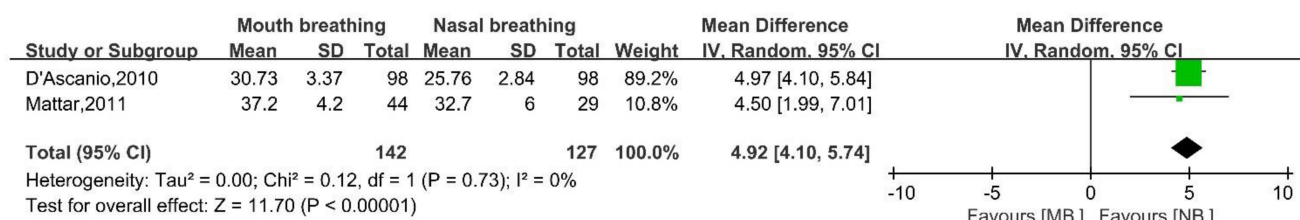

### C.4 Forest plot of PP-MP

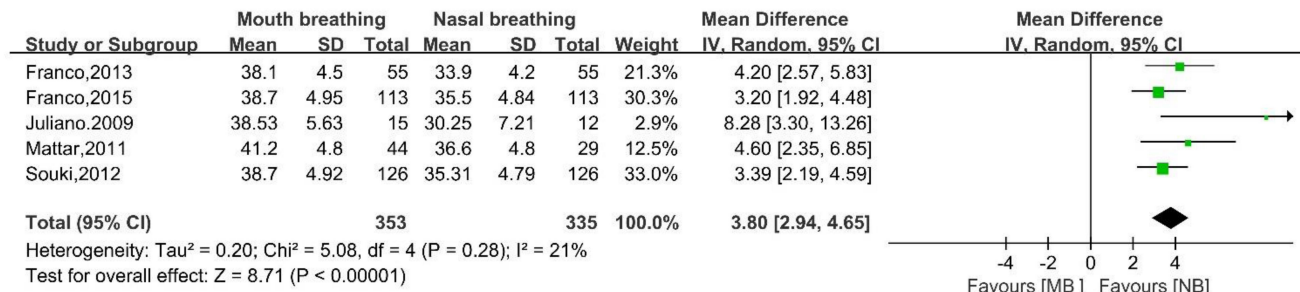

### C.5 Forest plot of SNGoGn
