# Supplementary material for: Effects of mouth breathing on facial skeletal development in children: a systematic review and meta-analysis
Source: PubMed Central journal article supplement (PMC7944632; doi:10.1186/s12903-021-01458-7), 2021-03-10
Supplement: 12903_2021_1458_MOESM5_ESM.pdf [file 12903_2021_1458_MOESM5_ESM.pdf]

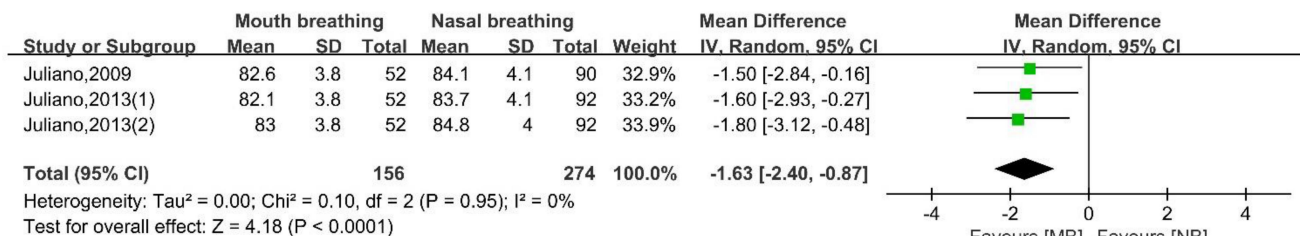

#### D.1 Forest plot of SNA

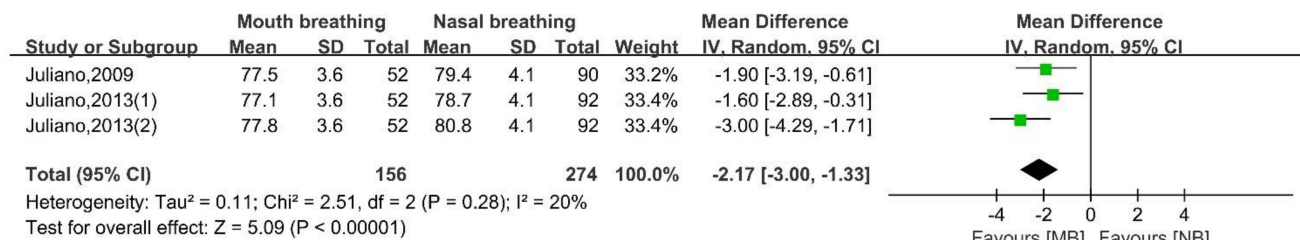

#### D.2 Forest plot of SNB

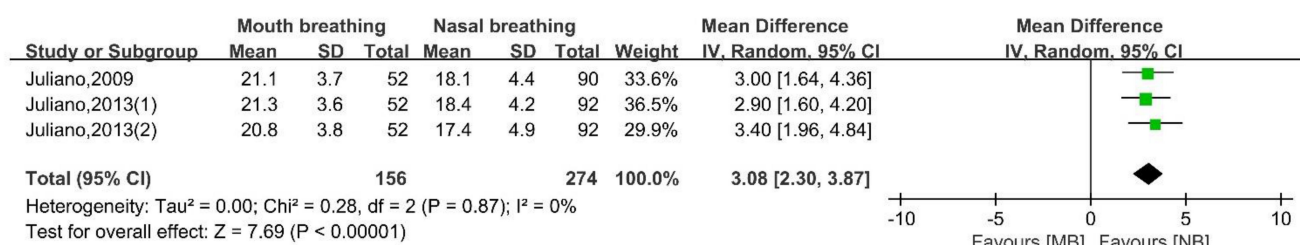

#### D.3 Forest plot of SN-OP

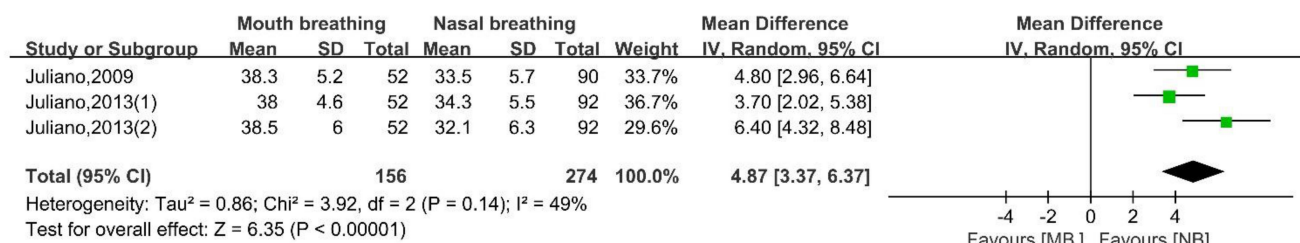

#### D.4 Forest plot of SNGoGN

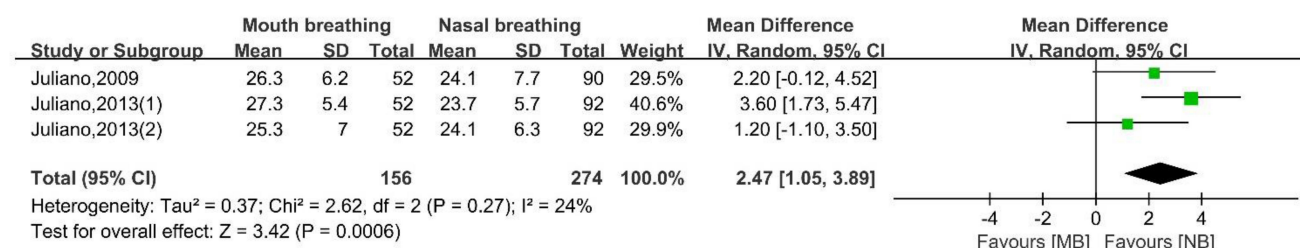

#### D.5 Forest plot of 1.NA

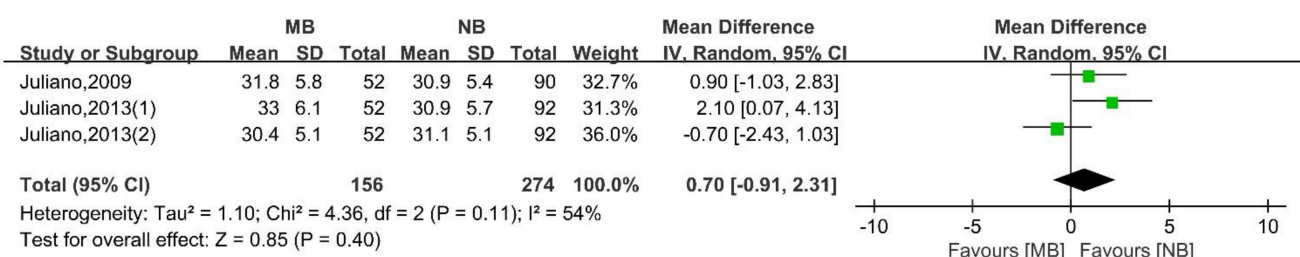

#### D.6 Forest plot of 1.NB

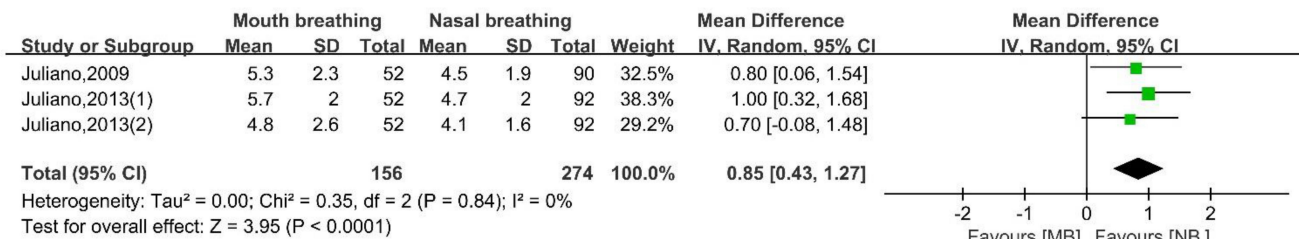

D.7 Forest plot of 1-NA

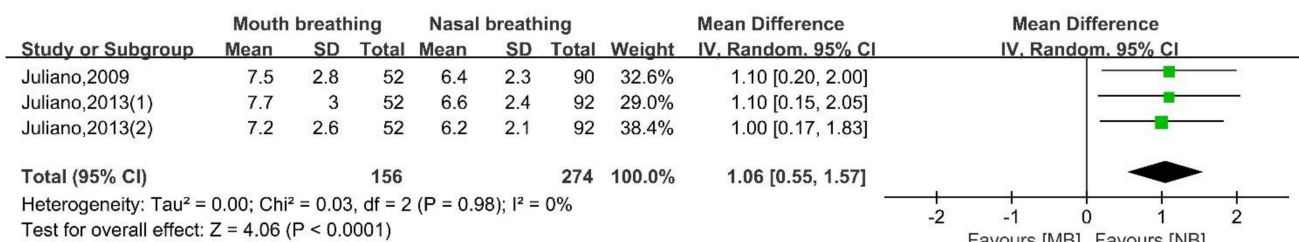

D.8 Forest plot of 1-NB

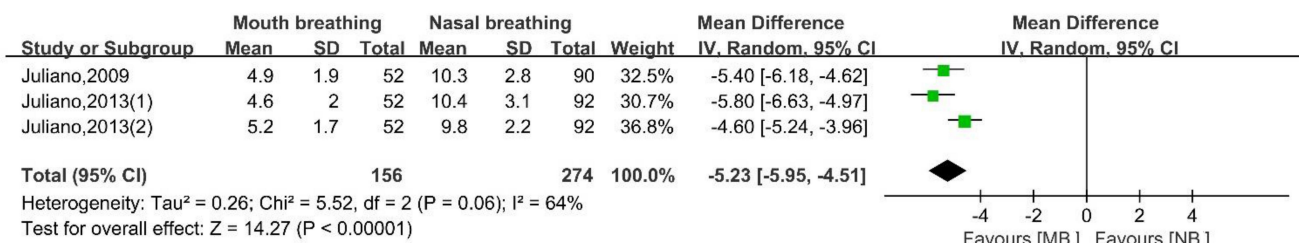

D.9 Forest plot of SPAS

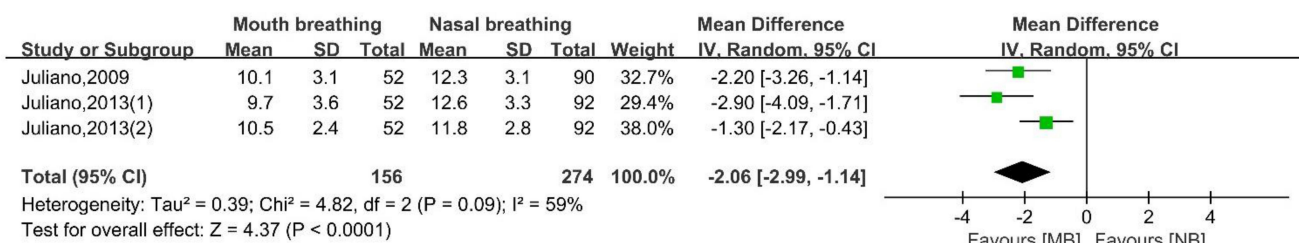

D.10 Forest plot of PAS

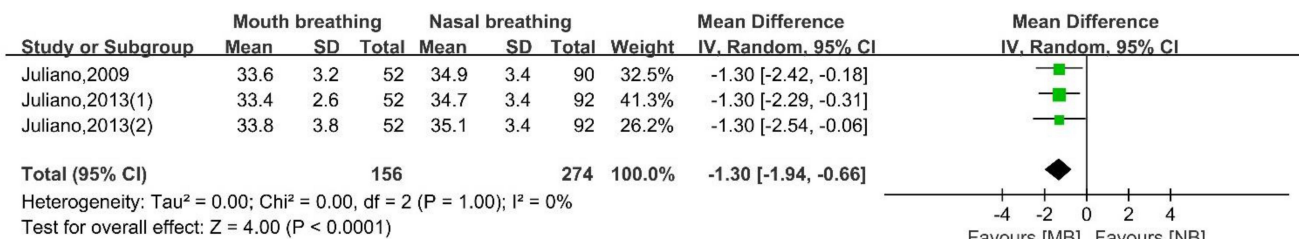

D.11 Forest plot of C3-H
