# Supplementary material for: Effects of mouth breathing on facial skeletal development in children: a systematic review and meta-analysis
Source: PubMed Central journal article supplement (PMC7944632; doi:10.1186/s12903-021-01458-7), 2021-03-10
Supplement: 12903_2021_1458_MOESM7_ESM.pdf [file 12903_2021_1458_MOESM7_ESM.pdf]

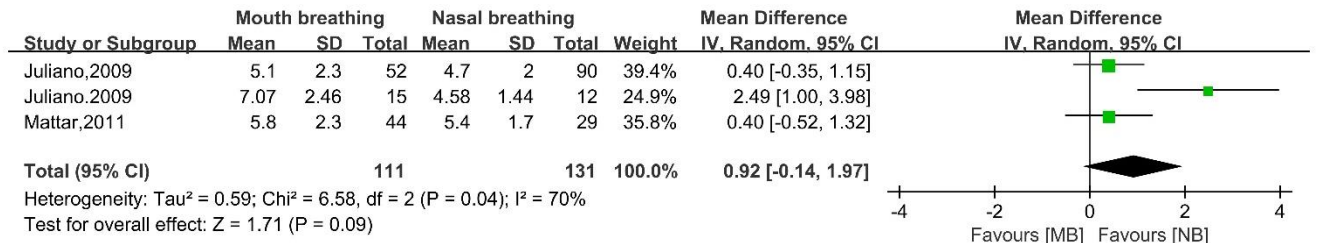

E2.1 Forest plot of ANB

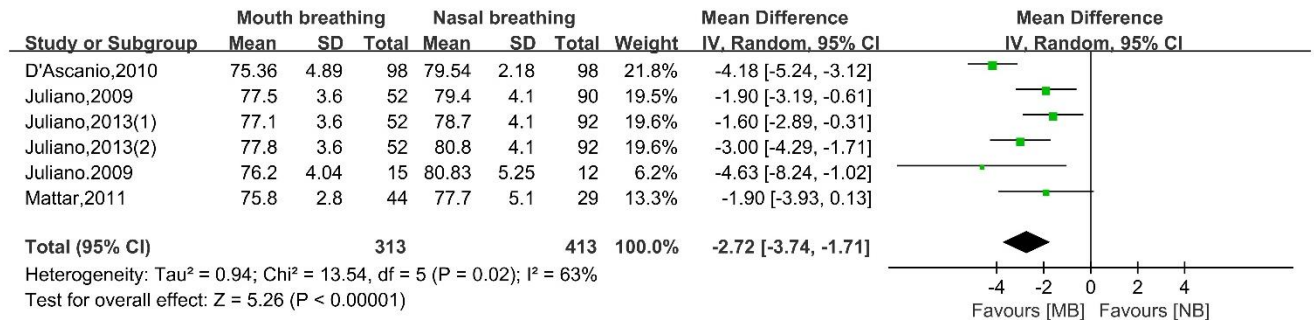

E2.2 Forest plot of SNB

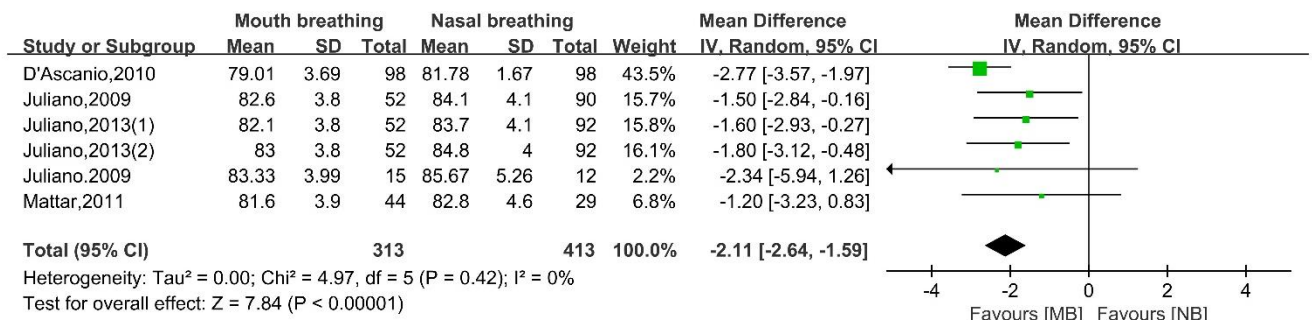

E2.3 Forest plot of SNA

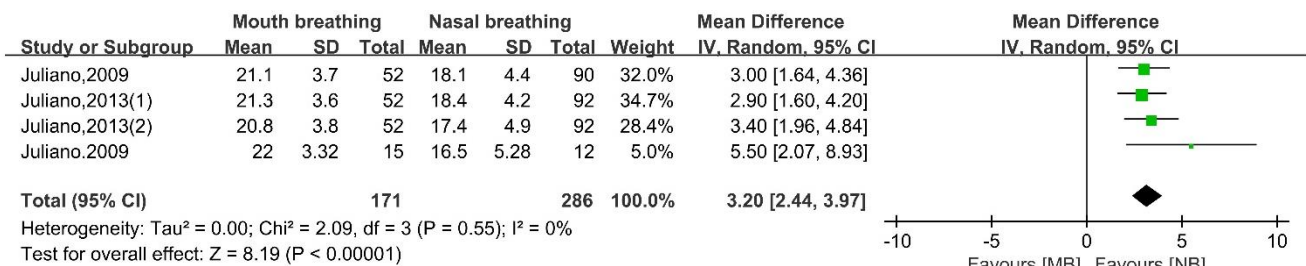

E2.4 Forest plot of SN-OP

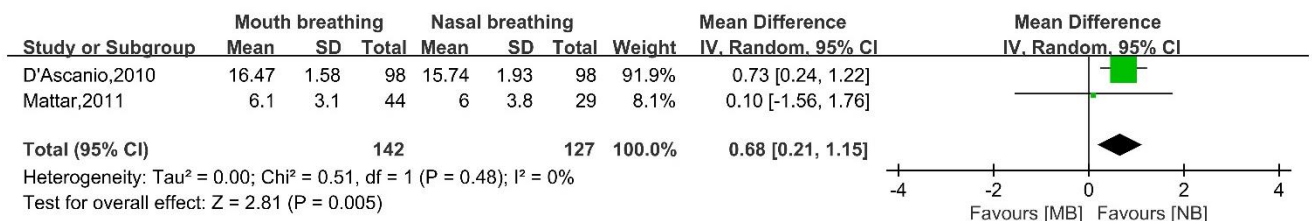

E2.5 Forest plot of SN-PP

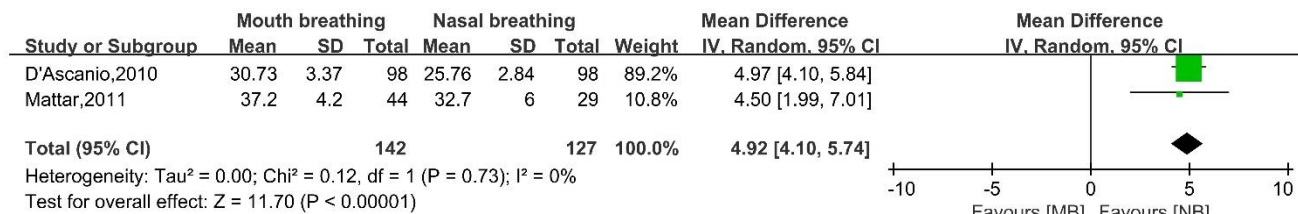

### E2.6 Forest plot of PP-MP

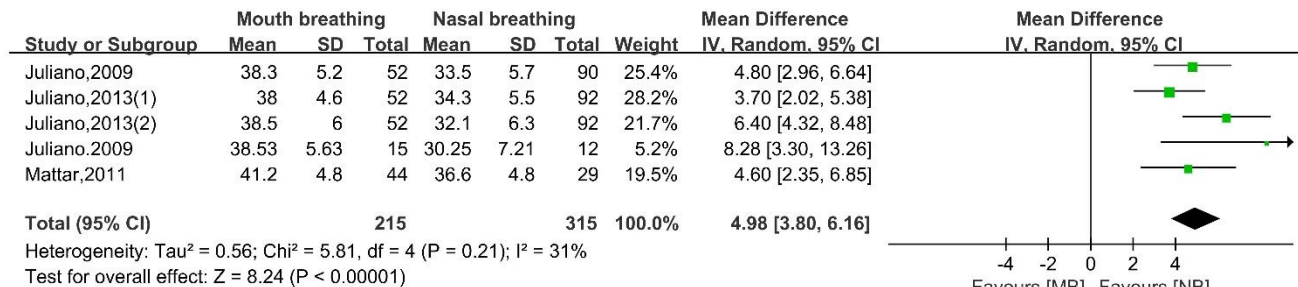

### E2.7 Forest plot of SNGoGn

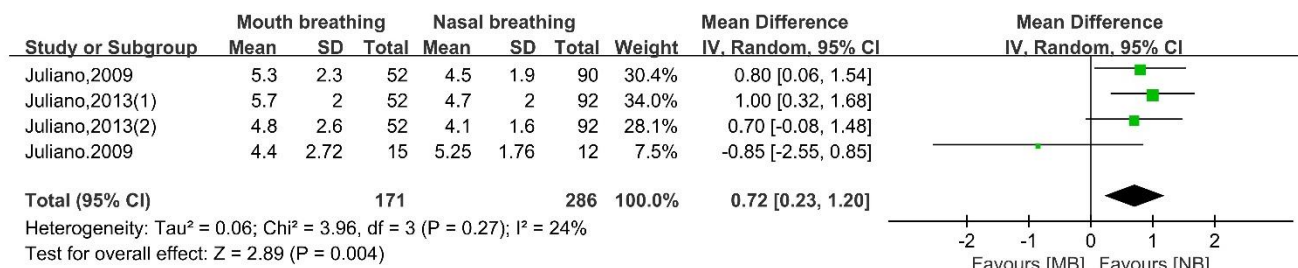

### E2.8 Forest plot of 1-NA

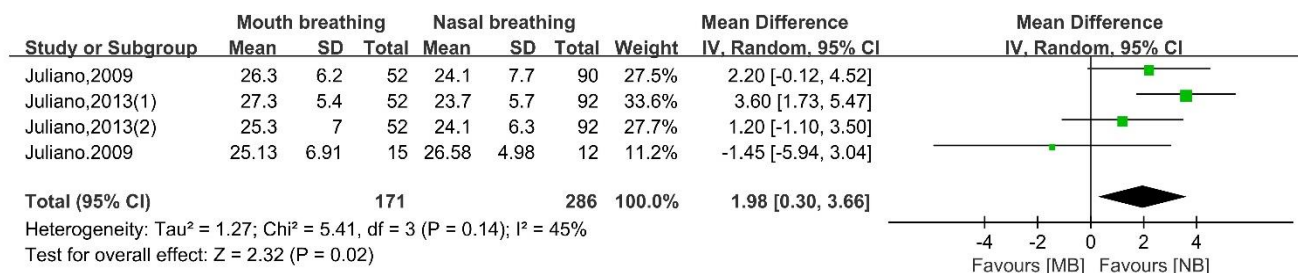

### E2.9 Forest plot of 1.NA

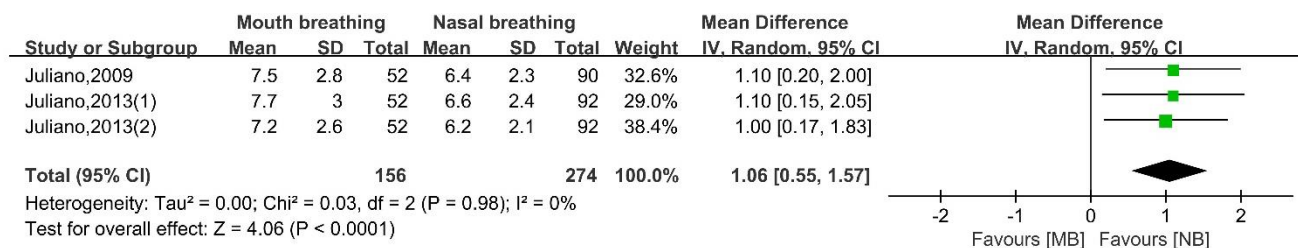

### E2.10 Forest plot of 1-NB

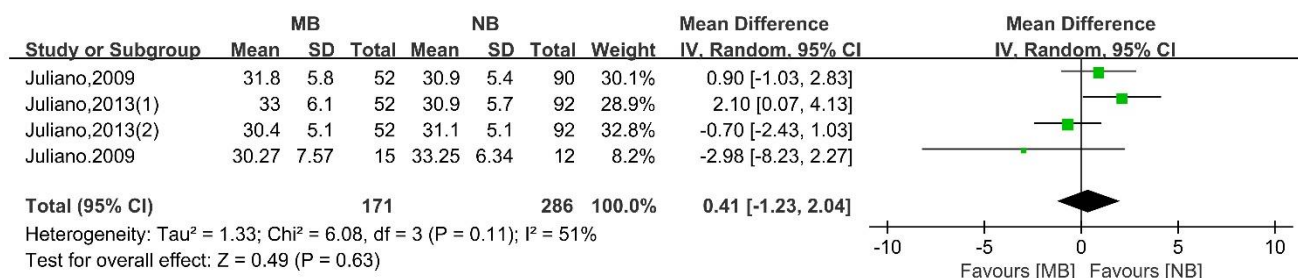

### E2.11 Forest plot of 1.NB

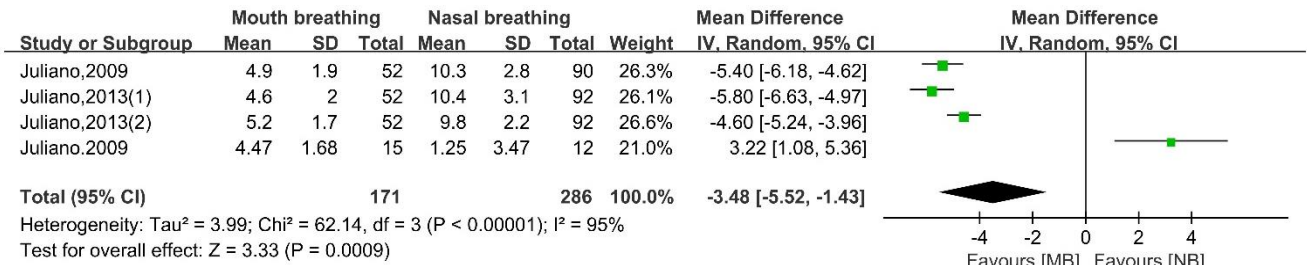

E2.12 Forest plot of SPAS

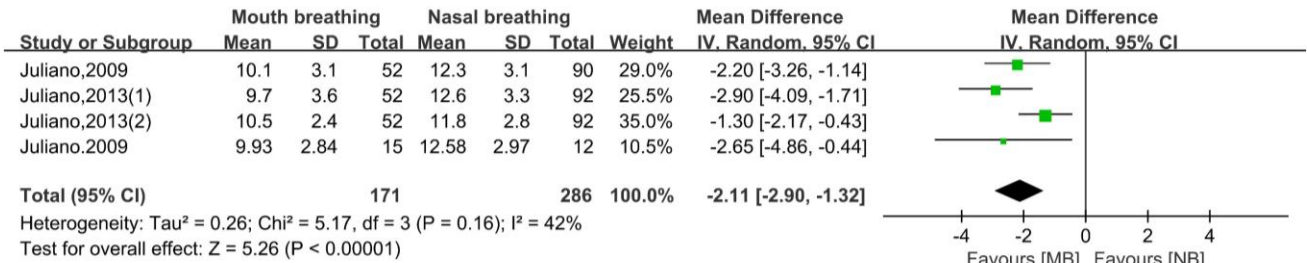

E2.13 Forest plot of PAS

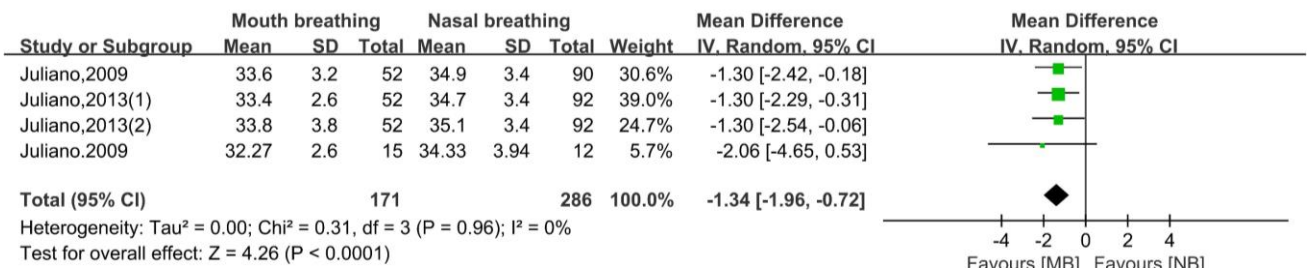

E2.14 Forest plot of C3-H

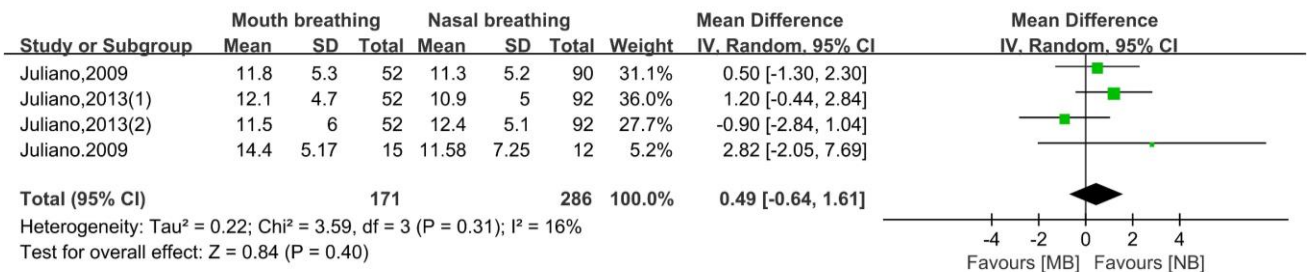

E2.15 Forest plot of MP-H
